# Supplementary material for: Controlled thermal nitridation resulting in improved structural and photoelectrochemical properties from Ta3N5 nanotubular photoanodes
Source: Royal Society of Chemistry journal article supplement (doi:10.1039/c5ra17227f), 2015-01-01
Supplement: c5ra17227f1.pdf [file c5ra17227f1.pdf]

## Supporting Information for

### Controlled Thermal Nitridation Resulting in Improved Structural and Photoelectrochemical Properties from Ta<sub>3</sub>N<sub>5</sub> Nanotubular Photoanodes

Sherdil Khan<sup>a</sup>, Sérgio Ribeiro Teixeira,<sup>a</sup> Marcos Jose Leite Santos<sup>b\*</sup>

<sup>a</sup>Instituto de Física, UFRGS, Av Bento Gonçalves 9500 PO Box - 15051 91501-970, POA-RS, Brazil. Phone: +55-51-33086498

<sup>b</sup>Instituto de Química, UFRGS, Av Bento Gonçalves 9500 PO Box - 15051 91501-970, POA-RS, Brazil. Phone: +55-51-33089625

\*E-mail address: [mjls@ufrgs.br](mailto:mjls@ufrgs.br) Tel : + 55 51 3308 9625; + 55 51 3308 9626

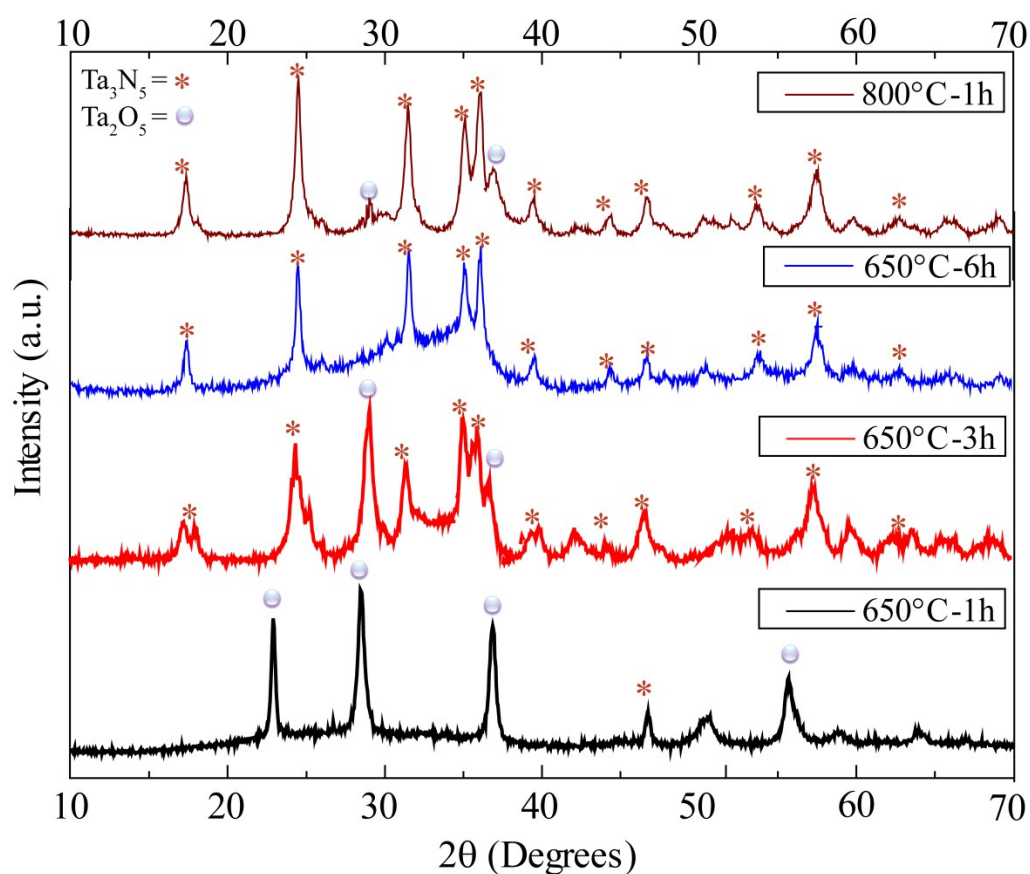

Fig. S1 XRD patterns of the samples prepared at 650°C and 800°C of nitridation.

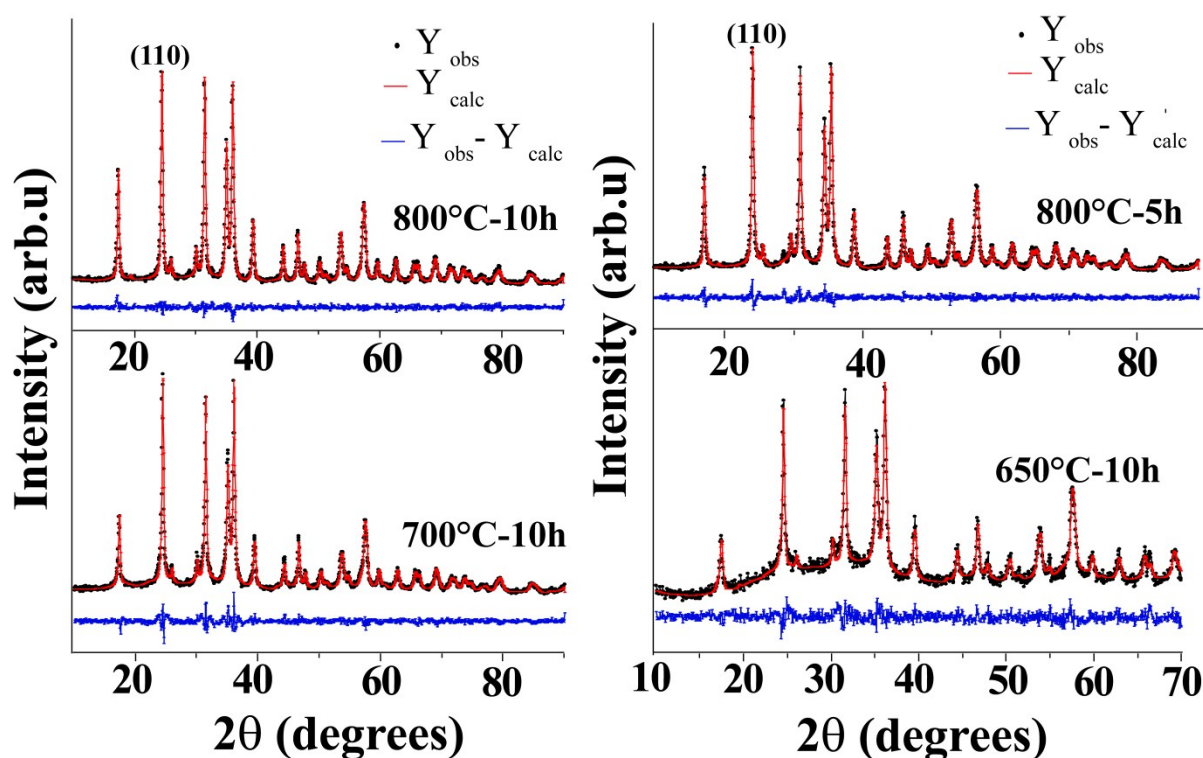

**Fig. S2** Rietveld refinement profile for  $\text{Ta}_3\text{N}_5$  NTs; (•) observed  $Y_{\text{obs}}$ , (red solid lines) calculated  $Y_{\text{calc}}$ , (blue solid lines)  $Y_{\text{obs}} - Y_{\text{calc}}$  difference of phase.

**Table S1** Estimated geometrical dimensions of  $\text{Ta}_3\text{N}_5$  nanotubes as a function of nitridation temperature and time.\*

| Sample      | Wall thickness/nm* | Diameter/nm* | Length/ $\mu\text{m}^\dagger$ |
|-------------|--------------------|--------------|-------------------------------|
| As-Anodized | 34                 | 130          | 1.60                          |
| 650°C-10h   | 34                 | 128          | 1.58                          |
| 700°C-10h   | 33                 | 125          | 1.52                          |
| 750°C-10h   | 32                 | 110          | 1.40                          |
| 800°C-2h    | 33                 | 120          | 1.50                          |
| 800°C-3h    | 30                 | 100          | 1.40                          |
| 800°C-5h    | 28                 | 95           | 1.35                          |
| 800°C-10h   | 28                 | 90           | 1.20                          |
| 850°C-3h    | 28                 | 90           | 1.25                          |
| 900°C-3h    | 25                 | 75           | 1.10                          |
| 900°C-10h   | -                  | -            | -                             |
| 1000°C-3h   | -                  | -            | -                             |

\* Wall thicknesses and Diameters of the NTs were calculated from TEM images taken from different locations.

† Lengths of the NTs were calculated from SEM images.

**Table S2** Percentages of vacancies (vac), occupancies (occ), substitutions (sub) in the Wyckoff positions, cell parameters and agreement factors deduced from the Rietveld refinements.

| Sample    | Ta1 (4c)  | Ta2 (8f)  | N1 (4c)   | N2/O2 (8f) | N3 (8f)   | R <sub>bragg</sub> -factor | R <sub>f</sub> -factor | Chi <sup>2</sup> | a<br>b<br>c |
|-----------|-----------|-----------|-----------|------------|-----------|----------------------------|------------------------|------------------|-------------|
| 650°C-10h | 97.98 occ | 99.89 occ | 71.33 occ | 0 – occ    | 99.98 occ | 6.19                       | 4.06                   | 1.43             | 3.88516     |
|           | 2.02 vac  | 0.11 vac  | 28.67 vac | 100 subs   | 0.02 vac  |                            |                        |                  | 10.16713    |
|           |           |           |           |            |           |                            |                        |                  | 10.24118    |
| 700°C-10h | 94.60 occ | 99.97occ  | 69.71 occ | 37.10 occ  | 100 occ   | 3.33                       | 1.94                   | 1.99             | 3.89520     |
|           | 5.40 vac  | 0.03 vac  | 30.29 vac | 62.90 sub  | 0 – vac   |                            |                        |                  | 10.19483    |
|           |           |           |           |            |           |                            |                        |                  | 10.26891    |
| 800°C-5h  | 93.87 occ | 98.32 occ | 94.40 occ | 66.01 occ  | 100 occ   | 2.70                       | 1.45                   | 1.51             | 3.89962     |
|           | 6.128 vac | 1.68 vac  | 5.60 vac  | 33.99 sub  | 0 – vac   |                            |                        |                  | 10.20950    |
|           |           |           |           |            |           |                            |                        |                  | 10.27345    |
| 800°C-10h | 94.58 occ | 98.39 occ | 95.03 occ | 80.01 occ  | 100 occ   | 4.14                       | 2.41                   | 1.37             | 3.89325     |
|           | 5.42 vac  | 1.61 vac  | 4.97 vac  | 19.99 sub  | 0 – vac   |                            |                        |                  | 10.20868    |
|           |           |           |           |            |           |                            |                        |                  | 10.26509    |

**Table S3** (Photo)electrochemical parameters of Ta<sub>3</sub>N<sub>5</sub> NTs obtained under various conditions of temperatures and nitridation times.\*

| Sample    | V <sub>oc</sub> (dark)V vs Ag/AgCl | V <sub>oc</sub> (AM 1.5) V vs Ag/AgCl | I <sub>ph</sub> (0.64V vs RHE) 0 V vs Ag/AgCl | I <sub>ph</sub> (1.23V vs RHE) 0.6 V vs Ag/AgCl |
|-----------|------------------------------------|---------------------------------------|-----------------------------------------------|-------------------------------------------------|
| 650°C-10h | 0.10                               | -0.32                                 | 70 μA                                         | 180 μA                                          |
| 700°C-10h | 0.10                               | -0.32                                 | 151 μA                                        | 328 μA                                          |
| 750°C-10h | 0.11                               | -0.36                                 | 251 μA                                        | 710 μA                                          |
| 800°C-1h  | 0.08                               | -0.26                                 | 107 μA                                        | 98 μA                                           |
| 800°C-02h | 0.10                               | -0.34                                 | 251 μA                                        | 556 μA                                          |
| 800°C-05h | 0.10                               | -0.36                                 | 940 μA                                        | 2.6 mA                                          |
| 800°C-10h | 0.11                               | -0.33                                 | 280 μA                                        | 2.4 mA                                          |
| 900°C-10h | 0.11                               | -0.35                                 | 1.8 mA                                        | 3.9 mA                                          |
| 1000°C-3h | 0.10                               | -0.34                                 | 600 μA                                        | 2.8 mA                                          |

\* To calculate I<sub>ph</sub> the current in dark was subtracted.
